# Supplementary material
Source: publisher figshare collection journal article supplement (https://acs.figshare.com/ndownloader/files/6752187)
Supplement: Supplementary file 1 [file 6752187]

## Nanocarriers from GRAS Zein Proteins to Encapsulate Hydrophobic Actives

Nikolas T. Weissmueller<sup>†1</sup>, Hoang D. Lu<sup>†1</sup>, Amanda Hurley<sup>2</sup>, Robert K. Prud'homme<sup>\*1</sup>

<sup>1</sup>Department of Chemical and Biological Engineering, <sup>2</sup>Department of Molecular Biology  
Princeton University, Princeton, New Jersey 08544, United States

\*To whom correspondence should be addressed; E-mail: prudhomm@princeton.edu

<sup>†</sup>Co-first authors

### UV absorbance of Nile Red in solution and encapsulated in NCs:

UV absorbance spectra of NCs and Nile Red dye were collected at room temperature by an Evolution 300 UV-visible Spectrophotometer (Thermo Electron Corporation, Madison, WI, USA) in the wavelength range 200–900nm, with a resolution of 1nm. Samples were measured in a quartz cuvette with a path length of 1cm.

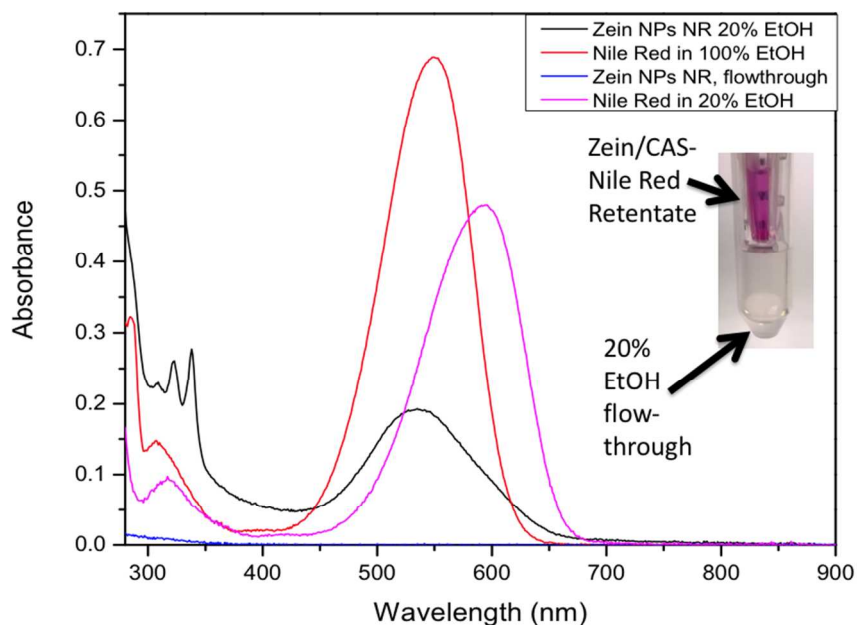

**Supplemental Information Figure 1:** Nile Red encapsulation efficiency. UV-Vis optical density spectra for free Nile Red in 100% EtOH (initial feed), 20% EtOH (final dispersion), or encapsulated in Zein:CAS NCs with VitE-Ac core. The NC dispersion flow through, obtained by centrifugal filtration (3kD MWCO, 10,000g for 10min) showed no detectable UV-Vis density characteristic of Nile Red.
